# Supplementary material for: Effect of Rootstock Genotype and Arbuscular Mycorrhizal Fungal (AMF) Species on Early Colonization of Apple
Source: MDPI journal article supplement (doi:10.3390/plants13101388), 2024-05-16
Supplement: s1 [file s1]

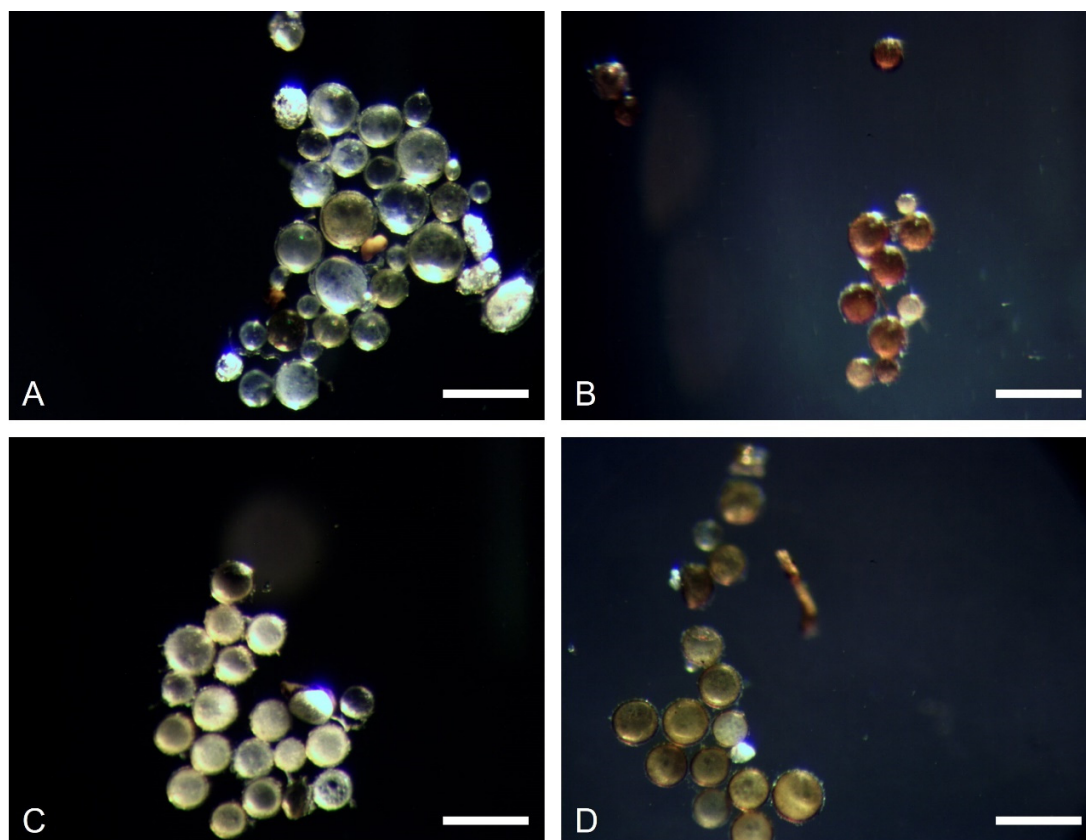

**Figure S1.** Spores of (A) *Rhizophagus irregularis*, (B) *Septoglomus deserticola*, (C) *Claroideoglomus claroideum* and (D) *Claroideoglomus etunicatum*; scale bars = 200  $\mu\text{m}$

>HG\_003\_ST1130121\_E12

TAACATCGTCTGATTCTAGTCGGCATAGTTTATGGTTAAGACTACGACGGTATCTGATCGTCTTCGAT  
 CCCCTAACTTTCGTTCTTGATTAATGAAAACATCCTTGGCAAATGCTTTCGCAGTAGTTAGTCTTCAAT  
 AAATCCAAGAATTTACCTCTGACAATTGAATACTAATGCCCCAACTATCCCTATTAATCATTACGGT  
 GATCCTAGAAACCAACAAAATAGAATCATGCCGTCCTATTTTATTATTCCATGCTAATGTATTCAAGCA  
 AAATGCCTGCTTTAAACACTCTAATTTTTTCAAAGTAAAGGTCCTGGTTCCCCGTGACACCCAATTAAG  
 GGCATCGCGGTTCTCCAGAAGGTGAGAAATTGACTACACCAGTTCATACCCCTTAGGGCACGACCGAT  
 GTGTCAATCCCGAAAATTCAACTACGAGCTTTTTAACTGCAACAACCTTAATATACGCTATTGGAGCTGG  
 AATTACCGCGGCTGCTGGCACCAGACTTGCCCTCCAATTGTTCTCGTTAAGGGATTAAATTGTACTC  
 ATTCCAATTACGAGACCCGAAAGAGCCCCGATTGTTATTTATTGTCACCTACCTCCCCGTGTCGGGATT  
 GGGTAATTTGCGCGCCTGCTGCCTTCCTTGGATGTGGTAGCCGTTTCTCAGGCTCCCTCTCCGGAATCG  
 AACCCTAATTCCCCGTTACCCGTTACCACCATGGTAGGCCTCTATCCT

| Accession | Description                                                 | Max score | Total score | Query coverage | E-value | Max identity |
|-----------|-------------------------------------------------------------|-----------|-------------|----------------|---------|--------------|
| Y17639    | Claroideoglomeraceae Claroideoglomus etunicatum<br>VTX00193 | 734       | 734         | 100.0%         | 0       | 99.9%        |

**Figure S2:** 18S rRNA sequence data obtained from a single spore isolated from the commercial inoculum expected to contain *C. etunicatum*. The MaarjAM database (<https://maarjam.ut.ee/?action=sBlast&id=132258>) was used to confirm AMF species identity. Quality sequence data (with clear nucleotide peaks) could not be obtained for any other isolates.

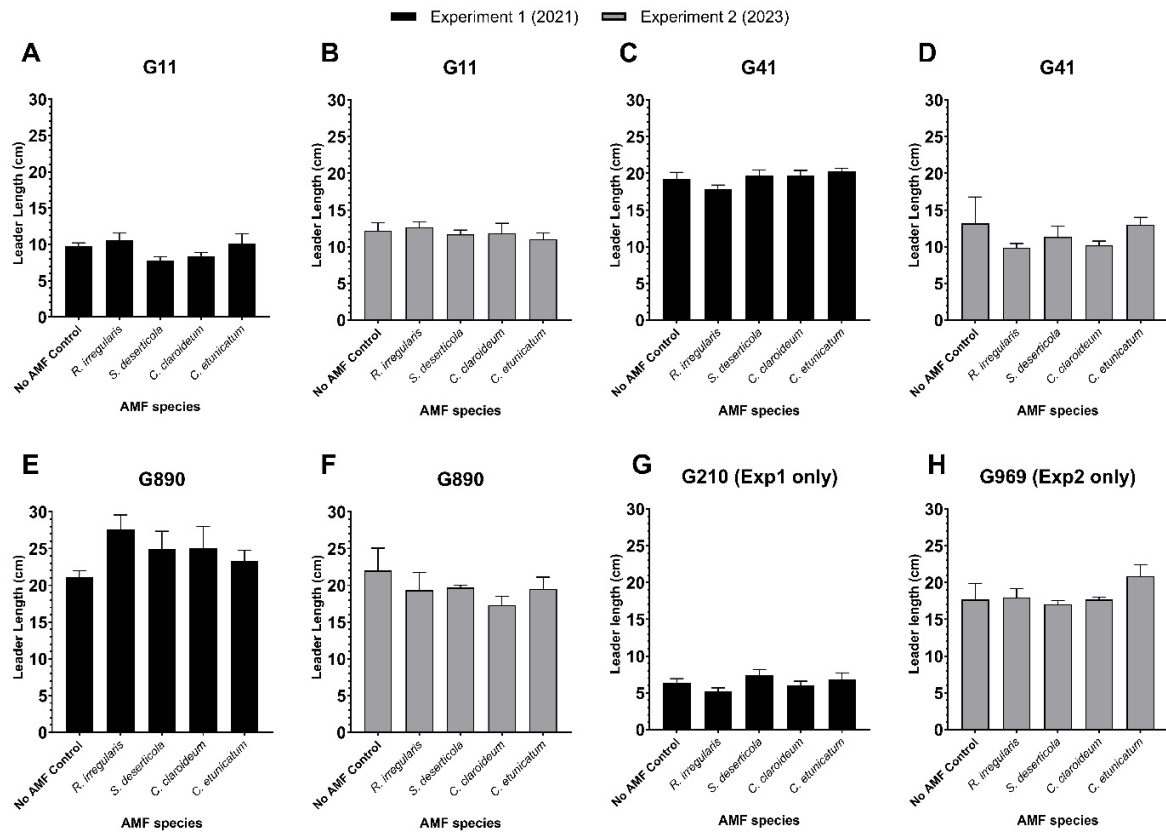

**Figure S3:** Leader shoot lengths of apple rootstock genotypes inoculated with different species of AMF, 5 weeks after inoculation in Exp 1 (black bars) and Exp 2 (grey bars). Different letters indicate statistically significant differences ( $p < 0.05$ ) in leader length within each rootstock genotype (Two-way ANOVA on transformed ( $y=\ln(y)$ ) data followed by Tukey's multiple comparisons tests). Data represents the mean of 7 replicates (Exp 1) and 3 replicates (Exp 2). Error bars represent the standard error of the mean.

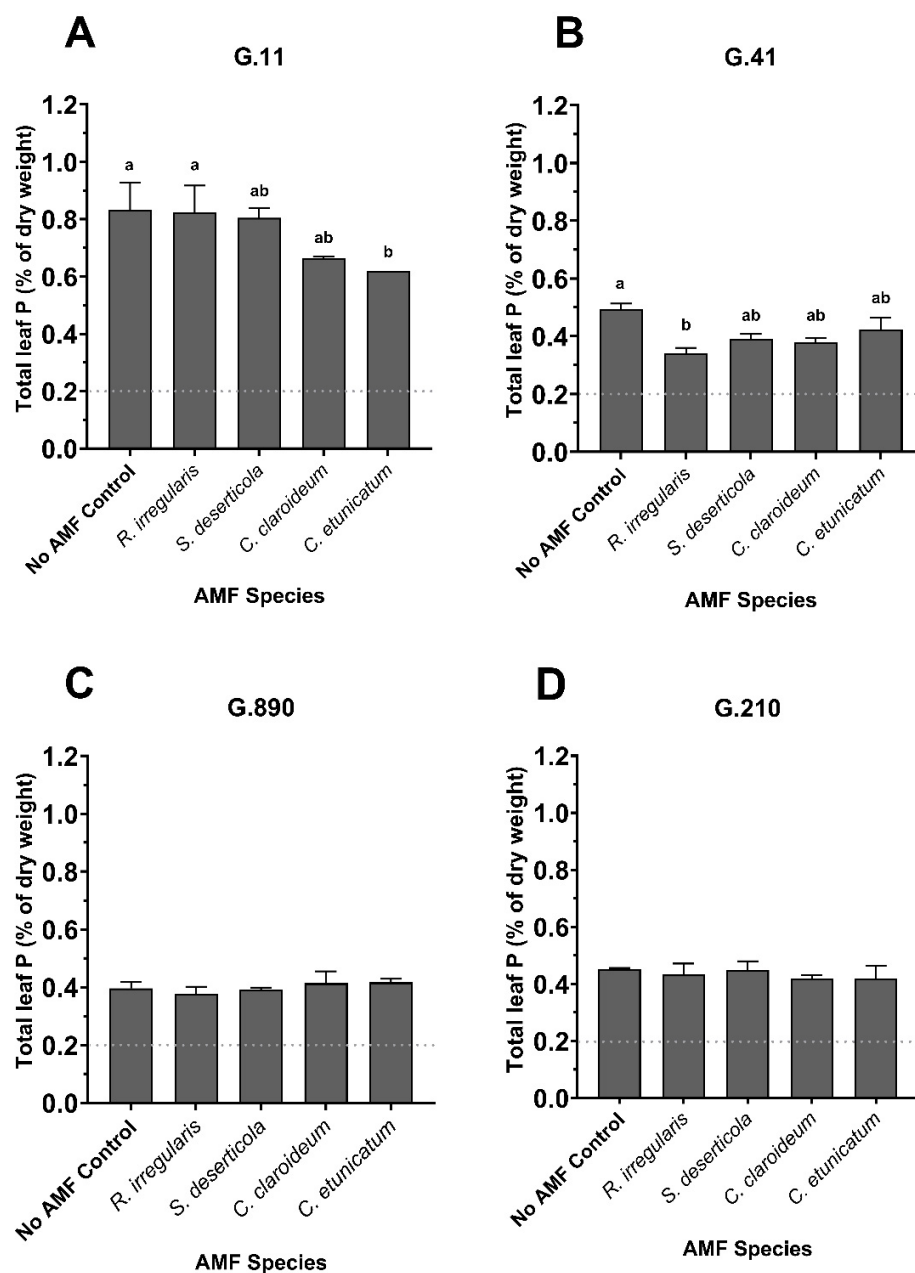

**Figure S4:** Total leaf foliar P (% of dry weight) in 4 different apple rootstocks inoculated with different species of AMF, 5 weeks after inoculation in Exp 1. Letters indicate statistical differences ( $p < 0.05$ ) in total leaf P (% of dry weight) observed according to two-way ANOVA followed by Tukey's multiple comparisons test. The dashed horizontal line indicates adequate P nutrition ( $> 0.2\%$ ). Data represents the mean of 3 samples pooled from 7 replicate plants.

**Table S1:** Mean percentage of AMF colonization for each apple rootstock genotype x AMF treatment combination at 5 weeks post-inoculation in Exp1 (2021) and at 2-, 5- and 8-weeks post-inoculation in Exp2 (2023). At each timepoint, data was compared across rootstocks for a given AMF species; rootstocks with the same letter were not significantly different (Dunnett's T3 tests following Welch's ANOVA test). Columns without letters indicate no significant differences. Exp1 values are based on 7 biological replicates per rootstock genotype/AMF treatment combination. Exp2 values are based on 3 biological replicates (x 3 technical replicates each).

| Timepoint      | Treatment | <i>R. irregularis</i> | <i>S. deserticola</i> | <i>C. claroideum</i> | <i>C. etunicatum</i> |
|----------------|-----------|-----------------------|-----------------------|----------------------|----------------------|
|                | Genotype  |                       |                       |                      |                      |
| Exp1 – 5 weeks | G.11      | 6.29                  | 5                     | 5 <sup>ab</sup>      | 4.29                 |
| Exp1 – 5 weeks | G.41      | 4.57                  | 8.43                  | 6.57 <sup>ab</sup>   | 5.71                 |
| Exp1 – 5 weeks | G.210     | 3.86                  | 4                     | 2.57 <sup>a</sup>    | 4.71                 |
| Exp1 – 5 weeks | G.890     | 4.43                  | 5.14                  | 7.71 <sup>b</sup>    | 4.29                 |
| Exp2 – 2 weeks | G.11      | 0.47 <sup>a</sup>     | 0                     | 0.41                 | 0.2 <sup>a</sup>     |
| Exp2 – 2 weeks | G.41      | 4.87 <sup>b</sup>     | 0.17                  | 1.4                  | 1.98 <sup>b</sup>    |
| Exp2 – 2 weeks | G.969     | 9.56 <sup>ab</sup>    | 0                     | 0.11                 | 9.6 <sup>c</sup>     |
| Exp2 – 2 weeks | G.890     | 4.82 <sup>ab</sup>    | 1.13                  | 0.77                 | 6.88 <sup>abc</sup>  |
| Exp2 – 5 weeks | G.11      | 10.16                 | 1.07                  | 25.28                | 40.73 <sup>a</sup>   |
| Exp2 – 5 weeks | G.41      | 14.31                 | 0.27                  | 12.85                | 28.86 <sup>ab</sup>  |
| Exp2 – 5 weeks | G.969     | 5.73                  | 0                     | 0                    | 3.74 <sup>b</sup>    |
| Exp2 – 5 weeks | G.890     | 9.27                  | 0                     | 5.9                  | 7.13 <sup>b</sup>    |
| Exp2 – 8 weeks | G.11      | 0 <sup>a</sup>        | 0 <sup>a</sup>        | 0.36 <sup>a</sup>    | 0 <sup>a</sup>       |
| Exp2 – 8 weeks | G.969     | 29.09 <sup>b</sup>    | 4.59 <sup>ab</sup>    | 33.42 <sup>b</sup>   | 25.74 <sup>b</sup>   |
| Exp2 – 8 weeks | G.890     | 4.15 <sup>b</sup>     | 9.32 <sup>b</sup>     | 36.66 <sup>b</sup>   | 42.85 <sup>b</sup>   |
